# Supplementary material for: Hypoxia is a Key Driver of Alternative Splicing in Human Breast Cancer Cells
Source: PubMed Central journal article supplement (PMC5481333; doi:10.1038/s41598-017-04333-0), 2017-06-22
Supplement: 41598_2017_4333_MOESM1_ESM.pdf [file 41598_2017_4333_MOESM1_ESM.pdf]

# **Hypoxia is a Key Driver of Alternative Splicing in Human Breast Cancer Cells**

Jian Han<sup>1</sup>, Jia Li<sup>1</sup>, Jolene Caifeng Ho<sup>1</sup>, Grace Sushin Chia<sup>1</sup>, Hiroyuki Kato<sup>1</sup>, Sudhakar Jha<sup>1</sup>, Henry Yang<sup>1</sup>, Lorenz Poellinger<sup>1,2</sup> and Kian Leong Lee<sup>1</sup>

<sup>1</sup> Cancer Science Institute of Singapore, National University of Singapore, 117599, Singapore

<sup>2</sup> Department of Cell and Molecular Biology, Karolinska Institutet, Stockholm, SE-171 77, Sweden

Short title: Hypoxia Drives Alternative Splicing in Breast Cancer Cells

## Supporting Information

**Supplementary Figure S1.** Classification and quantification of alternative splicing events. Schemas show types of splicing for **(a)** intron retention, **(b)** exon skipping, **(c)** 5' splice sites, **(d)** 3' splice sites and **(e)** alternative first exons. Reads corresponding to normal splicing are shown in green while specific alternative splicing events are shown in red. General gene structure is shown in blue with thick bars representing exons and thin lines indicating introns. Equations for the calculation of the splicing index (SI) for each splicing type are as indicated.



**Supplementary Figure S2.** Apoptosis assay and validation of RNA-Seq splicing events by qRT-PCR or RT-PCR. **(a)** Apoptosis analysis with Annexin V (Alexa Fluor 647) and SYTOX Blue staining showing the distribution of live, early and late apoptotic MCF7 cells in normoxia, 4h acute hypoxia and 24 hours chronic hypoxia. The x-axis shows fluorescence intensity for Annexin V (Alexa Fluor 647) dye, indicative of cells undergoing apoptosis, while the y-axis shows fluorescence intensity for SYTOX blue dye, indicative of dead cells both on logarithmic scales. Graph indicates the percentage of live (blue), early (orange) and late apoptotic (gray) cells out of the total number of cells for each treatment. Error bars indicate SEM for  $n \geq 3$  replicates. **(b)** The expression of the alternative first exon isoforms for *MXI1* was measured using qRT-PCR and normalized against *PPIA* expression as the housekeeping reference control. All qRT-PCR analyses were performed in three biological replicates ( $n=3$ ). Error bars indicate SEM while statistical significance was evaluated using Student's t-test. \* indicates  $p$ -value $<0.05$ , \*\*  $p$ -value $<0.01$ . **(c)** Table shows target genes used for the comparison of  $\Delta$ SI between RNA-Seq and that of qRT-PCR or RT-PCR. The  $\Delta$ SI used is expressed as a percentage according to the formulas described in Supplementary Fig. S1 for each splicing type. **(d)** Scatter plot shows correlation between the splicing index determined by RNA-Seq analysis (x-axis) and that of qRT-PCR or RT-PCR (y-axis) for target genes spliced during hypoxia.  $R^2$  indicates the coefficient of determination that quantifies how well the regression line fits the  $\Delta$ SI data points with a perfect fit at 1.

**Supplementary Figure S3.** 5' and 3' RACE-PCR analysis of AHNAK isoforms in hypoxia. Agarose gel images show **(a)** 5' RACE-PCR and **(b)** 3'RACE PCR products of *AHNAK* amplified from MCF7 cells subjected to 24h hypoxia. Red arrows show two alternative first exon isoforms of AHNAK amplified by 5' RACE-PCR as indicated. 3'RACE-PCR gel products show predominantly one AHNAK isoform with little alternative splicing at the 3' end. **(c)** Schema of the gene structures of the canonical AHNAK-001 isoform and the novel alternative first exon AHNAK non-coding transcript. Thin black lines denote introns, beige boxes show non-coding exons and blue boxes indicate protein coding exons.

**Supplementary Figure S4.** Specificity of RT-PCR detection of isoform expression in normoxia/hypoxia and analysis of nonsense mediated decay (NMD) of isoforms. Gel images show RT-PCR of hypoxia treated MCF7 mRNA samples with (RT) and without (NO RT) reverse transcription of **(a)** *LDHA*, **(b)** *TNFSF13* and **(c)** *ARHGAP4*. N indicates normoxia, H4 hypoxia 4h, H24 hypoxia 24h and NTC denotes the no template control. Three biological replicates (n=3) are shown. Low molecular weight bands in NO RT reactions of *TNFSF13* correspond to primer dimers. **(d)** Gel images show RT-PCR of *EEF1G*, *PTGS2*, intron retentions (IR) of *LDHA*, *TNFSF13*, *ARHGAP4* and *TRMU* of MCF7 cells treated with 10ug/ml cycloheximide (CHX) for 6h. The housekeeping gene *EEF1G* was used as a loading and negative NMD control. *PTGS2* was used as a positive NMD control.

**Supplementary Figure S5.** Specificity test of exon-exon junction primers used in exon skipping analysis. **(a)** Gel images show RT-PCR of *MARCH7*, *PCBP2* and *EIF4H* full length and exon skipping isoforms with single PCR products for each isoform-specific primer pair. The sanger sequencing results of **(b)** *MARCH7* full length (FL) and exon 9 skipping ( $\Delta E9$ ), **(c)** *PCBP2* full length (FL) and exon 11 skipping ( $\Delta E11$ ) and **(d)** *EIF4H* full length (FL) and exon 5 skipping ( $\Delta E5$ ) PCR products TA cloned into pGEM T-easy vectors are shown. Primer sequences used in this study are highlighted in grey. Exons are indicated using different colours. Partial sequences of the pGEM T-easy vector backbone are shown in black.

**Supplementary Figure S6. (a)** qRT-PCR analysis of the effect of cell density on hypoxia-regulated alternative splicing of *LDHA*, *VGLL4*, *MARCH7* and *PCBP2* genes. MCF7 cells were seeded at a density of 0.15, 0.3, 0.6 and 1.2 million cells as indicated. Line charts show qRT-PCR quantification of the expression of *LDHA*, *VGLL4*, *MARCH7* and *PCBP2* splicing isoforms over cell density in normoxia/hypoxia conditions after normalization to *PPIA* expression as the housekeeping reference control. **(b)** Line graph shows qRT-PCR quantification of *CA9* expression normalized to the *PPIA* housekeeping control in normoxia, 4h acute hypoxia and 24h chronic hypoxia at different cell densities as indicated. All qRT-PCR analyses were performed in three biological replicates (n=3). Error bars indicate SEM.

**Supplementary Figure S7.** (a) Full-length western blot picture of hypoxia-regulated RBPs used in Fig 1f. (b) Full-length gel picture of *LHDA* RT-PCR used in Fig 4a. (c) Full-length gel picture of *TNFSF13* RT-PCR used in Fig 4b. (d) Full-length gel picture of *ARHGAP4* RT-PCR used in Fig 4c. (e) Full-length gel picture of *LRCH3* RT-PCR used in Fig 6c. N indicates normoxia, H4 indicates hypoxia 4h, H24 indicates hypoxia 24h.

**Supplementary Table S1.** Global transcriptome alternative splicing events regulated during acute and chronic hypoxia. Table shows statistics of the number of alternative splicing events as determined by RNA-Seq analysis to be dysregulated in MCF7 cells during acute (4h) and chronic (24h) hypoxia compared to the normoxia control. Splicing types are as indicated and considered significant for a FDR of  $<0.01$  and  $|\Delta SI|$  of  $\geq 15\%$ .

**Supplementary Table S2.** Mapping summary of RNA-Seq reads obtained from hypoxia and normoxia treated MCF7 cells. Table shows statistics of the sequencing depth obtained from RNA-Seq of MCF7 cells subjected to normoxia, acute and chronic hypoxia. Over 90% of reads map uniquely to the human genome reference hg19 in all samples.



**Supplementary Table S3.** List of qRT-PCR and RT-PCR primers used for the quantification of isoform abundance. Forward and reverse primers were designed using NCBI Primer-BLAST and used for qRT-PCR and RT-PCR respectively as indicated.

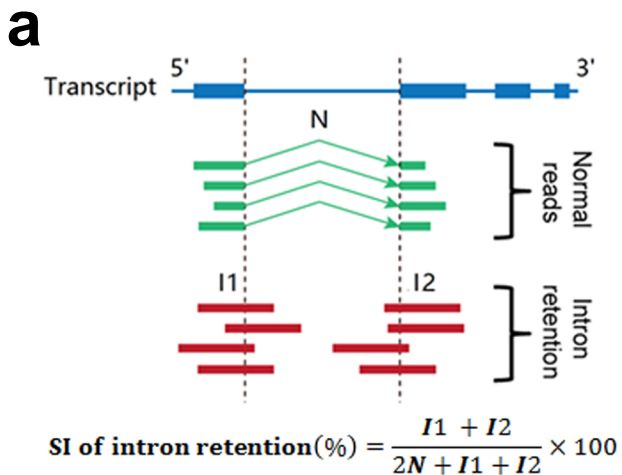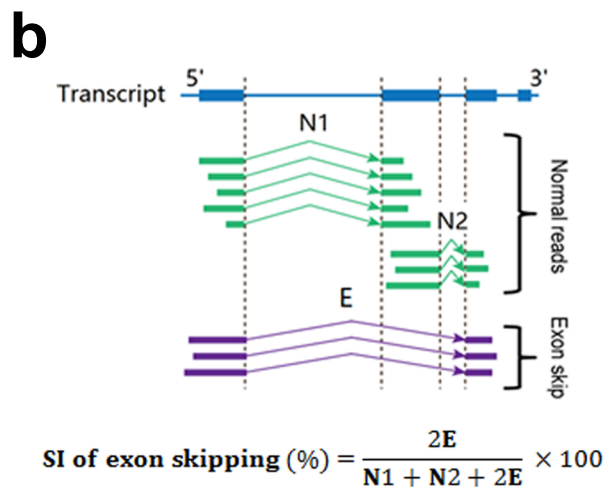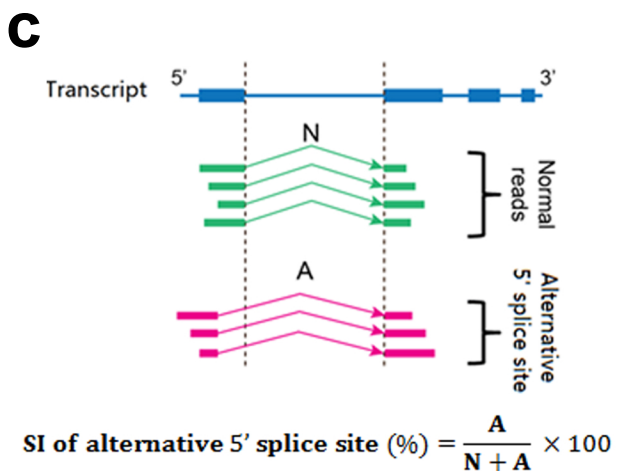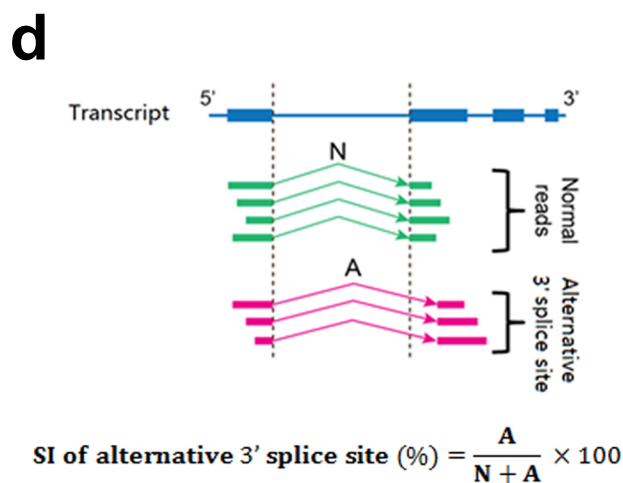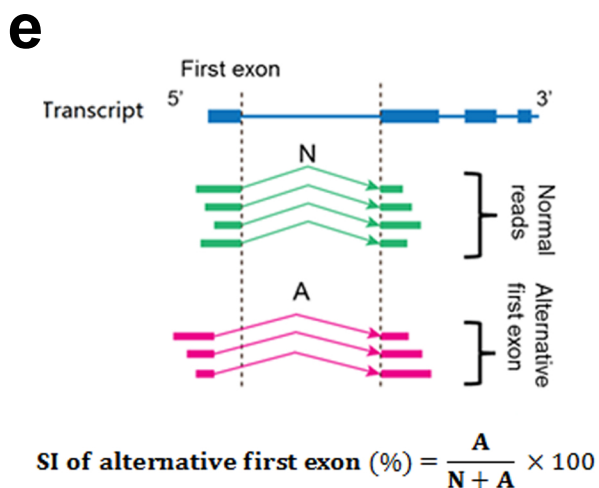

**Supplementary Figure S1**

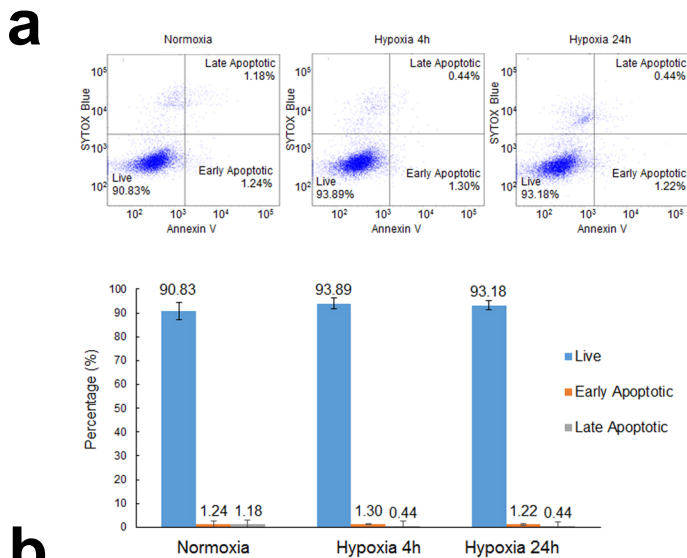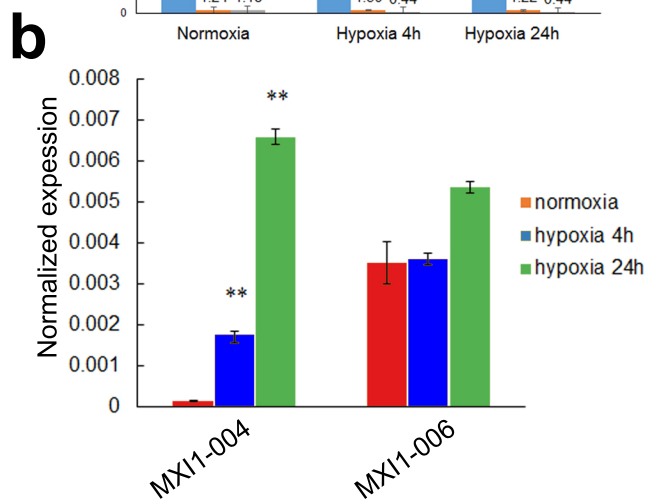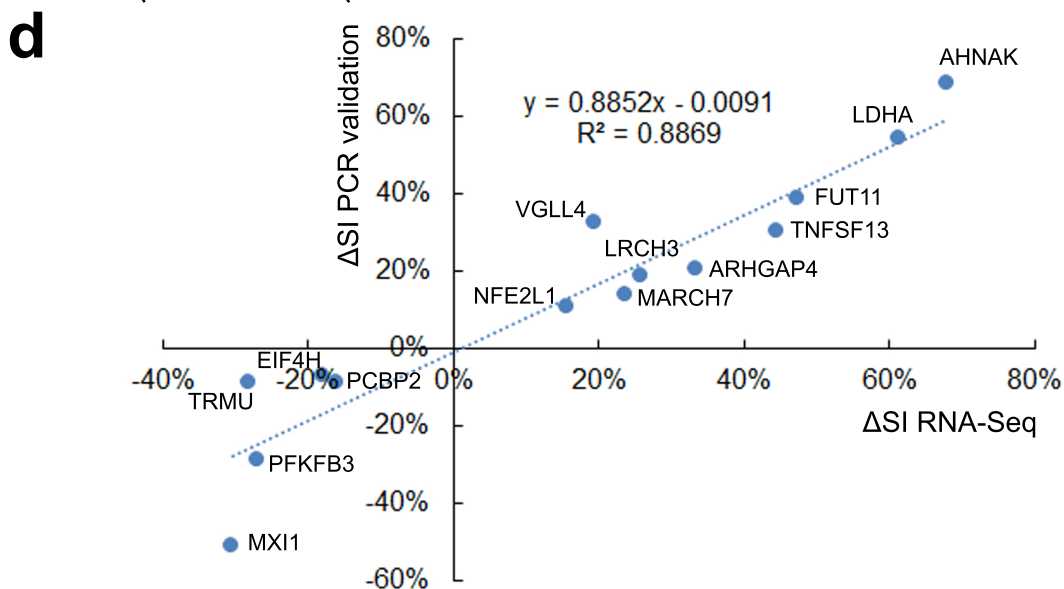

**c**

| Gene    | PCR     | RNA-Seq |
|---------|---------|---------|
| PCBP2   | -8.82%  | -15.98% |
| PFKFB3  | -28.85% | -27.03% |
| VGLL4   | 32.52%  | 19.44%  |
| EIF4H   | -7.10%  | -17.95% |
| MARCH7  | 13.58%  | 23.69%  |
| FUT11   | 38.73%  | 47.48%  |
| LDHA    | 54.29%  | 61.40%  |
| NFE2L1  | 10.50%  | 15.77%  |
| MXI1    | -51.19% | -30.44% |
| AHNAK   | 68.10%  | 68.05%  |
| TRMU    | -9.15%  | -28.24% |
| LRCH3   | 18.65%  | 25.78%  |
| TNFSF13 | 30.25%  | 44.55%  |
| ARHGAP4 | 20.44%  | 33.48%  |

**Supplementary Figure S2**

**a**

5' RACE

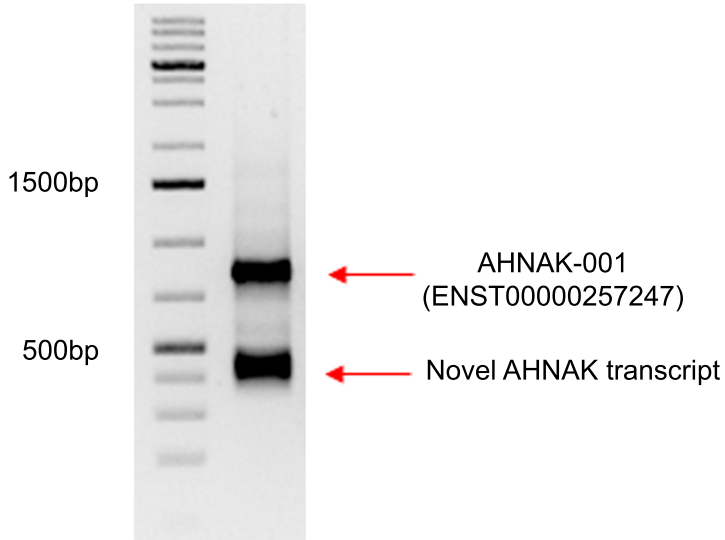**b**

3' RACE

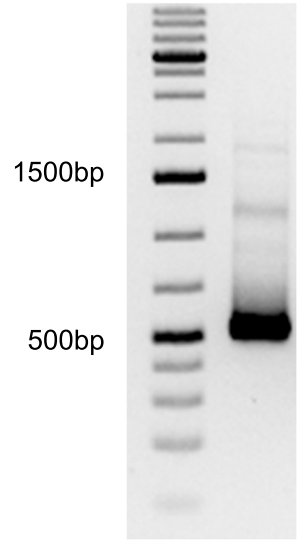**c**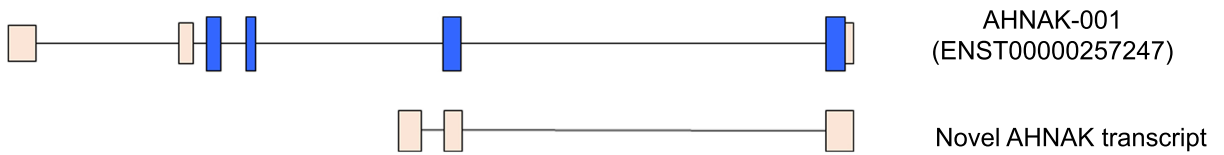**Supplementary Figure S3**

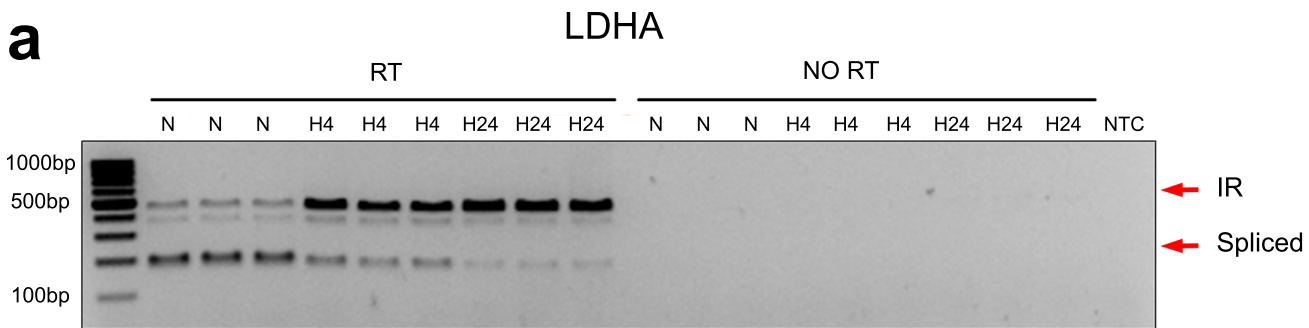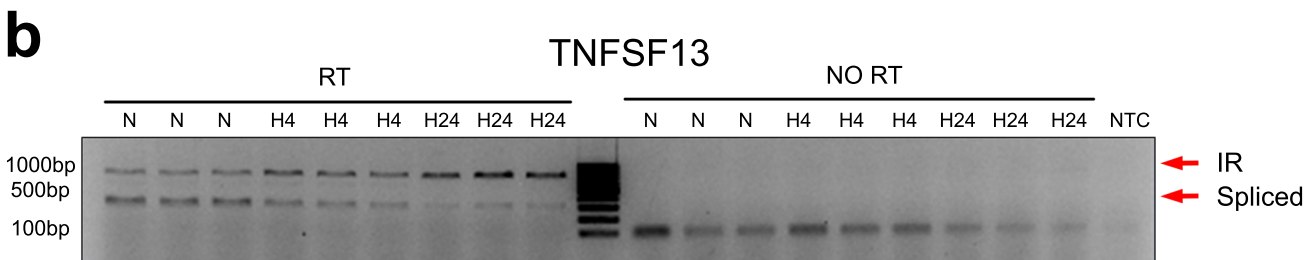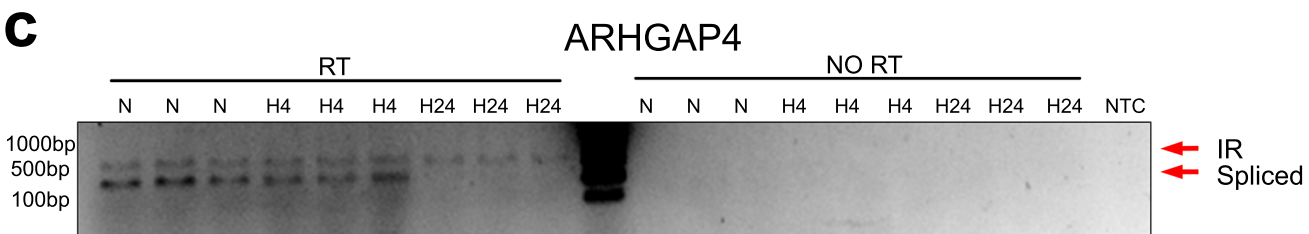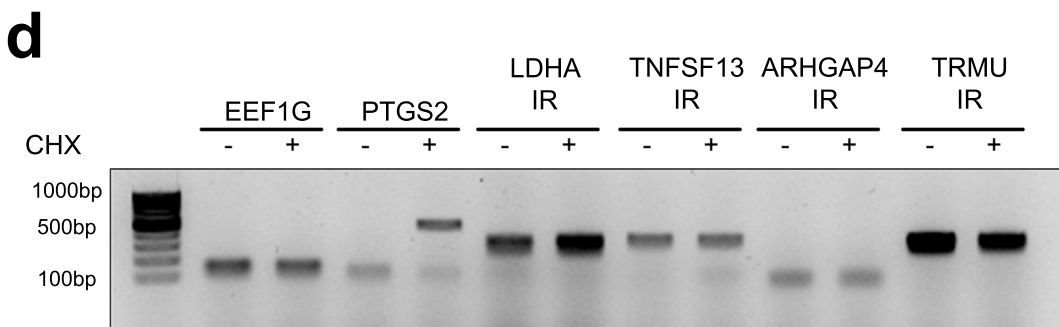

**Supplementary Figure S4**

**a**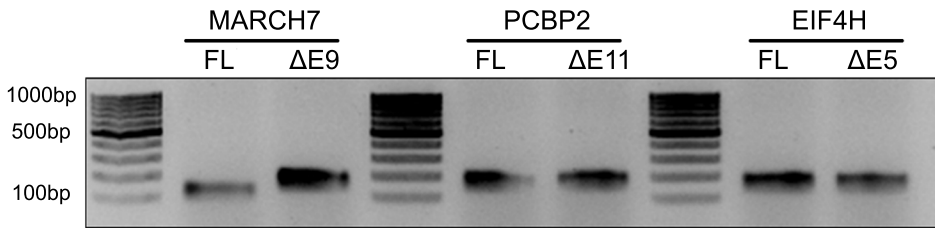**b**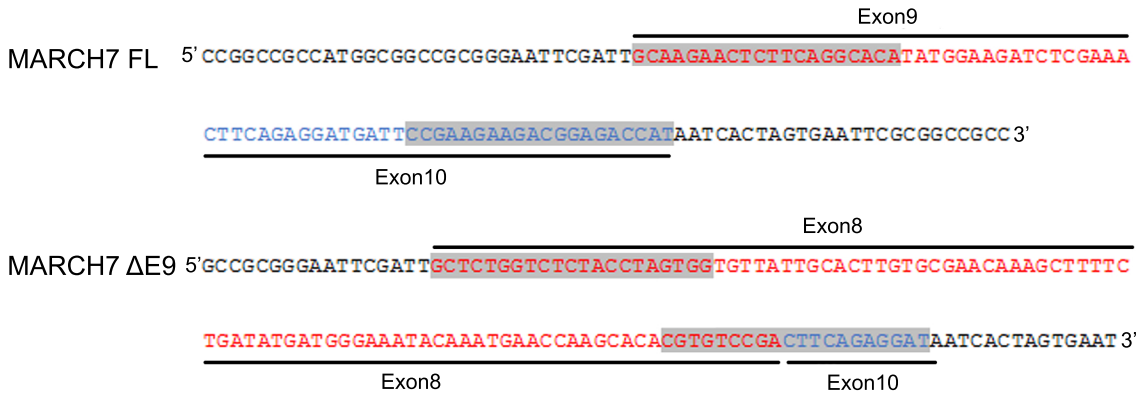**c**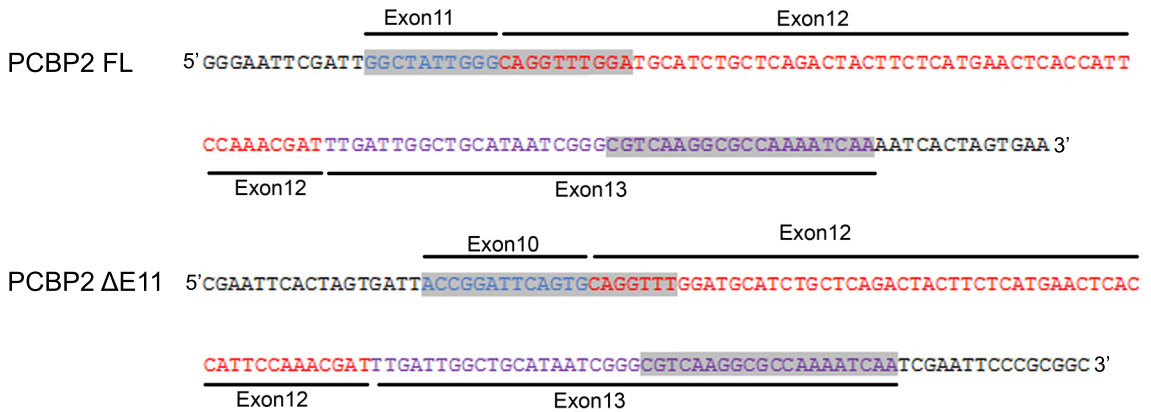**d**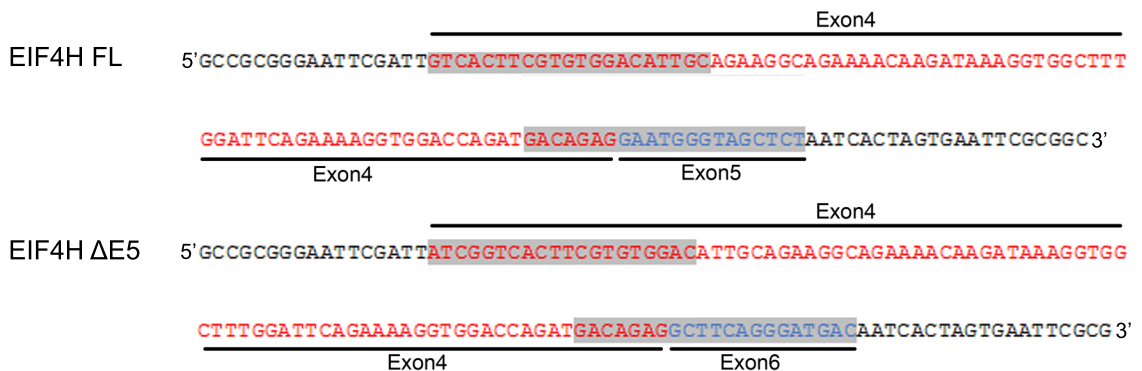

# Supplementary Figure S5

**a**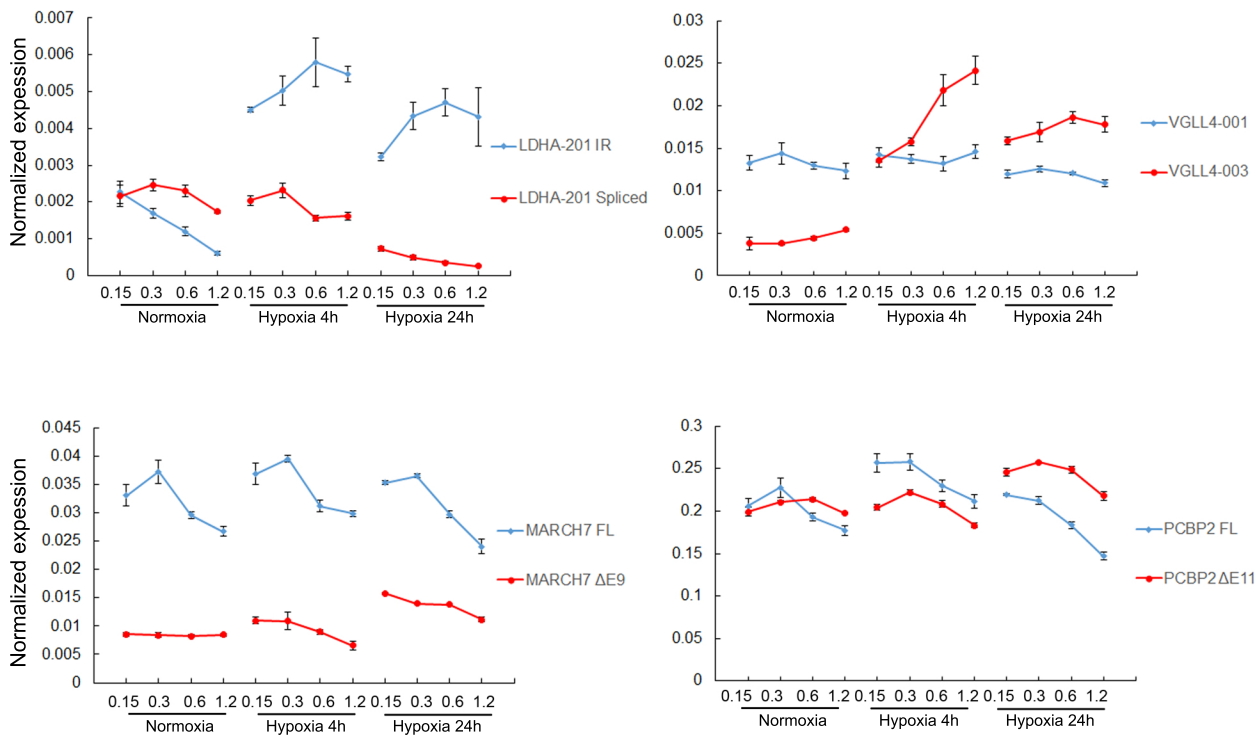**b**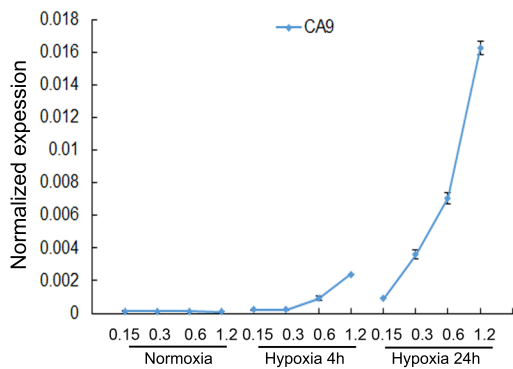**Supplementary Figure S6**

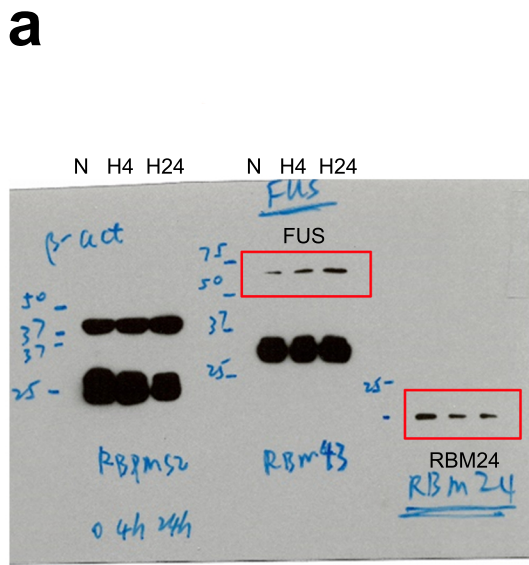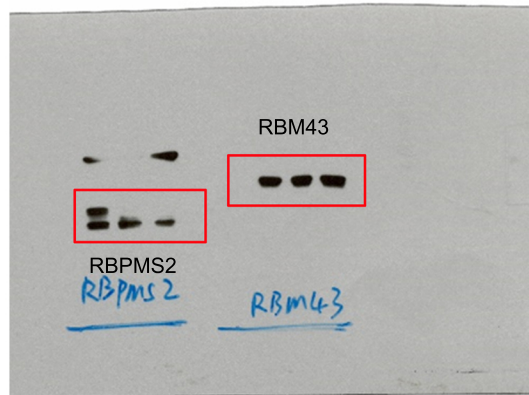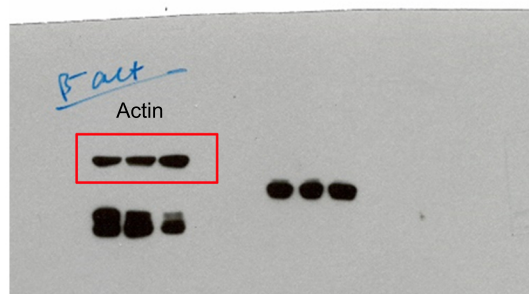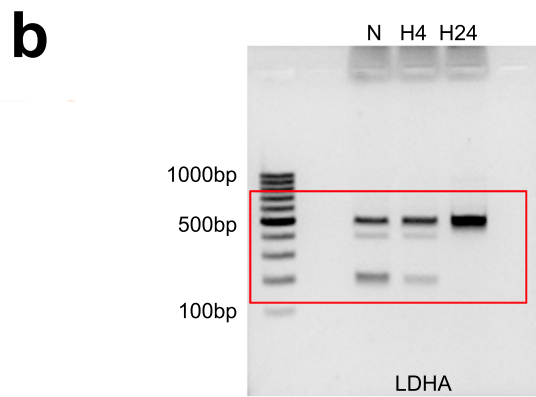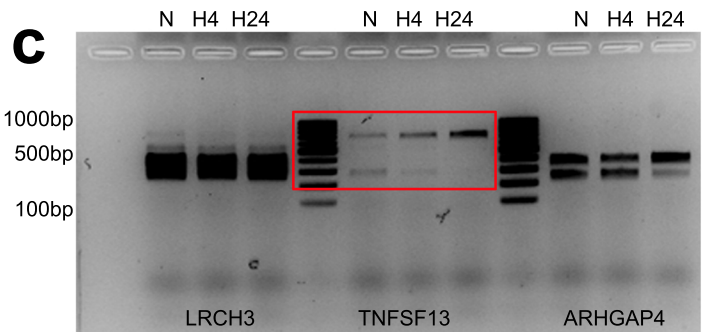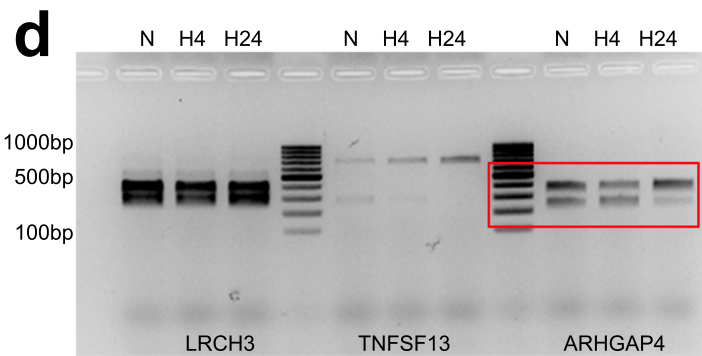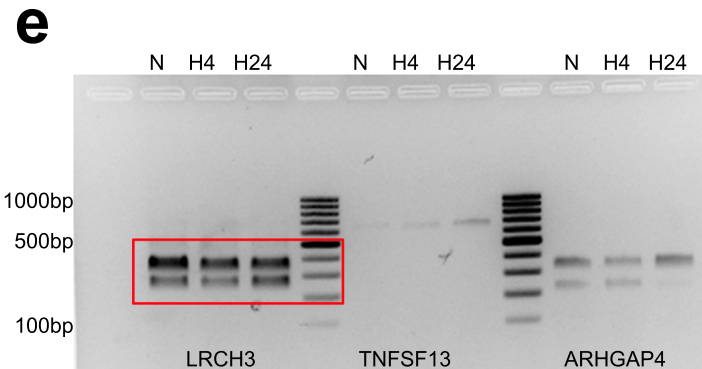

**Supplementary Figure S7**



| Event Type                 | Hypoxia 4h vs Normoxia<br>  $\Delta$ SI  $\geq$ 15% FDR<0.01 |       |       | Hypoxia 24h vs Normoxia<br>  $\Delta$ SI  $\geq$ 15% FDR<0.01 |       |       |
|----------------------------|--------------------------------------------------------------|-------|-------|---------------------------------------------------------------|-------|-------|
|                            | Novel                                                        | Known | Total | Novel                                                         | Known | Total |
| Exon skipping              | 77                                                           | 170   | 247   | 71                                                            | 188   | 259   |
| Intron retention           | 1224                                                         | 9     | 1233  | 1036                                                          | 6     | 1042  |
| Alternative 5' splice site | 114                                                          | 92    | 206   | 39                                                            | 86    | 125   |
| Alternative 3' splice site | 145                                                          | 109   | 254   | 117                                                           | 89    | 206   |
| Alternative first exon     | 22                                                           | 43    | 65    | 11                                                            | 41    | 52    |
| Total                      | 1582                                                         | 423   | 2005  | 1274                                                          | 410   | 1684  |

## Supplementary Table S1

| Samples     | Total reads | Uniquely mapped reads | Uniquely mapped reads percentage |
|-------------|-------------|-----------------------|----------------------------------|
| Normoxia    | 174,512,164 | 162,759,662           | 93.27%                           |
| Hypoxia 4h  | 176,070,129 | 165,128,413           | 93.79%                           |
| Hypoxia 24h | 193,852,715 | 181,465,538           | 93.61%                           |

## Supplementary Table S2

| <u>Gene</u> | <u>Transcript and Splicing</u>                                                 | <u>Position</u> | <u>Forward(F)/<br/>Reverse (R)</u> | <u>Sequence</u>        | <u>Size</u> |
|-------------|--------------------------------------------------------------------------------|-----------------|------------------------------------|------------------------|-------------|
| CA9         | CA9-001                                                                        | Exon5           | F                                  | CCTTTGCCAGAGTTGACGAG   | 109         |
| CA9         | CA9-001                                                                        | Exon6           | R                                  | GACAGCAACTGCTCATAGGC   |             |
| RBM43       | RBM43-001                                                                      | Exon2           | F                                  | ATCCGACAAGAACCAAGGGA   | 127         |
| RBM43       | RBM43-001                                                                      | Exon3           | R                                  | AGAGAGACTGTGAGTTCAGCAT |             |
| FUS         | FUS-001                                                                        | Exon1           | F                                  | GGTACTCAGCGGTGTTGGAA   | 147         |
| FUS         | FUS-001                                                                        | Exon3           | R                                  | ACTGCTCTGCTGGGAATAGC   |             |
| RBM24       | RBM24-001                                                                      | Exon2           | F                                  | CATTGATGGCAGAAAGGCCAA  | 105         |
| RBM24       | RBM24-001                                                                      | Exon3           | R                                  | AGGGCTGGATGAAGTTGTTGA  |             |
| RBPMS2      | RBPMS2-001                                                                     | Exon6           | F                                  | CCCCTACCCTTTGTACACCAC  | 151         |
| RBPMS2      | RBPMS2-001                                                                     | Exon7           | R                                  | ACGGTACTTCCATCCTTGCT   |             |
| LDHA        | LDHA-201 Spliced & Intron Retention                                            | Exon 1          | F                                  | CACCCAAACGTCGATATTCTT  | 148/356     |
| LDHA        | LDHA-201 Spliced & Intron Retention                                            | Exon 2          | R                                  | AGCACCAACCCCAACAACCTG  |             |
| LDHA        | LDHA-201 Spliced & Intron Retention<br>(used in Fig7c & Supplementary Fig S4d) | Exon 1          | F                                  | TGGCTGTGTCCTTGCTGTAG   |             |
| LDHA        | LDHA-201 Spliced                                                               | Exon 1 & 2      | R                                  | ACCAAAAGGAATCTTAGCGTGG | 163         |
| LDHA        | LDHA-201 Intron Retention<br>(used in Fig7c & Supplementary Fig S4d)           | Intron 1        | R                                  | TCTGTGAAGAGTGAAGGCC    | 176         |
| LDHA        | LDHA-001                                                                       | Exon 1          | F                                  | CGGATCTCATTGCCACGC     | 96          |
| LDHA        | LDHA-001                                                                       | Exon 2          | R                                  | AGCTGATCCTTTAGAGTTGCCA |             |
| LRCH3       | LRCH3-004 Exon Skipping & Inclusion                                            | Exon 14         | F                                  | CCCATCCAGAAGGTCTCAGC   | 200/272     |
| LRCH3       | LRCH3-004 Exon Skipping & Inclusion                                            | Exon 17         | R                                  | TGTTGGTTTCTGCCCTGACA   |             |
| TNFSF13     | TNFSF13-001 Spliced & Intron Retention                                         | Exon 1          | F                                  | TTGCCCTCTGGTTGAGTTGG   | 219/545     |
| TNFSF13     | TNFSF13-001 Spliced & Intron Retention                                         | Exon 2          | R                                  | TCCGGGATCTCTCCCCATTC   |             |
| TNFSF13     | TNFSF13-001 Intron Retention<br>(used in Supplementary Fig S4d)                | Exon1           | F                                  | CAGTTGCCCTCTGGTTGAGT   | 210         |
| TNFSF13     | TNFSF13-001 Intron Retention<br>(used in Supplementary Fig S4d)                | Intron1         | R                                  | ATCCTCTCCCAGACACCCTC   |             |
| ARHGAP4     | ARHGAP4-001 Spliced & Intron Retention                                         | Exon 16         | F                                  | CTGAAGCTCTACTCCGGAGC   | 172/260     |
| ARHGAP4     | ARHGAP4-001 Spliced & Intron Retention                                         | Exon 17         | R                                  | AGGTGAAGAGGTAGCGCAGA   |             |
| ARHGAP4     | ARHGAP4-001 Intron Retention<br>(used in Supplementary Fig S4d)                | Intron16        | F                                  | GGGTAGGGCACTTGCTGG     | 155         |
| ARHGAP4     | ARHGAP4-001 Intron Retention<br>(used in Supplementary Fig S4d)                | Exon17          | R                                  | GAAGAGGTAGCGCAGAACCA   |             |
| MARCH7      | MARCH7-001 Exon Inclusion                                                      | Exon 9          | F                                  | GCAAGAACTCTTCAGGCACA   | 72          |
| MARCH7      | MARCH7-001 Exon Inclusion                                                      | Exon 10         | R                                  | ATGGTCTCCGTCTTCTTCGG   |             |
| MARCH7      | MARCH7-001 Exon Skipping                                                       | Exon 8          | F                                  | GCTCTGGTCTCTACCTAGTGG  | 106         |
| MARCH7      | MARCH7-001 Exon Skipping                                                       | Exon 8&10       | R                                  | ATCCTCTGAAGTCGGACACG   |             |
| FUT11       | FUT11-001 Intron Retention                                                     | Intron 1        | F                                  | GCACCCTCATGACAGCCTTA   | 70          |
| FUT11       | FUT11-001 Intron Retention                                                     | Exon 2          | R                                  | TCCCGATTCTGCAGGCATTT   |             |
| FUT11       | FUT11-001 Spliced                                                              | Exon 1 & 2      | F                                  | CCACATCCCGGTAGACTCC    | 123         |
| FUT11       | FUT11-001 Spliced                                                              | Exon 2          | R                                  | TAGCGGGACAAGAAAGCCAA   |             |
| AHNAK       | AHNAK Novel                                                                    | Exon 1A         | F                                  | CTACGGTCCTCGTTTTGTGAGT | 146         |
| AHNAK       | AHNAK Novel                                                                    | Exon 2A         | R                                  | TGCTGGCTTCCTTCTGTTTGT  |             |
| AHNAK       | AHNAK-005                                                                      | Exon 5          | F                                  | ACGGGAAGCTGAAATTCGGT   | 88          |
| AHNAK       | AHNAK-005                                                                      | Exon 5          | R                                  | CCTGTCTCATCATCGCTCCC   |             |
| AHNAK       | AHNAK-001                                                                      | Exon 4          | F                                  | AGACCTGGACCCGTGAAGT    | 141         |
| AHNAK       | AHNAK-001                                                                      | Exon 5          | R                                  | GGGTGGAGACTGAAACTGCC   |             |
| MXI1        | MXI1-004                                                                       | Exon 0A         | F                                  | ACTCGATGGAGAAGCACATCA  | 123         |
| MXI1        | MXI1-006                                                                       | Exon 1B         | F                                  | CATGGAGCGGGTGAAGATGA   | 101         |
| MXI1        | MXI1-006 & MXI1-004                                                            | Exon 2          | R                                  | ATGAAGAGGCGTAGCCATGT   |             |
| NFE2L1      | NFE2L1-006                                                                     | Exon 1A         | F                                  | GGGAAGTAGCACTTGTTCGCT  | 156         |
| NFE2L1      | NFE2L1-001                                                                     | Exon 1B         | F                                  | GACGCCGAGCTAAGCAGTT    | 81          |
| NFE2L1      | NFE2L1-001 & 006                                                               | Exon 2A         | R                                  | GCCTTTCGTCTTGGGTCAGA   |             |
| TRMU        | TRMU-001 Spliced & Intron Retention<br>(used in Fig S4d)                       | Exon 2          | F                                  | GGTCTGTAAGTCCGACAAAGA  |             |
| TRMU        | TRMU-001 Spliced                                                               | Exon 3          | R                                  | CAGGATTGGGAGTCTTCTCTT  | 155         |
| TRMU        | TRMU-001 Intron Retention<br>(used in Fig S4d)                                 | Intron 2        | R                                  | GGCTGGTTACCGGATCCTTC   | 187         |

|        |                                     |              |   |                          |     |
|--------|-------------------------------------|--------------|---|--------------------------|-----|
| PCBP2  | PCBP2-202 Exon Inclusion            | Exon 11 & 12 | F | GGCTATTGGGCAGGTTTGA      | 107 |
| PCBP2  | PCBP2-202 Exon Skipping             | Exon 10 & 12 | F | ACCGGATTCAGTGCAGGTTT     | 110 |
| PCBP2  | PCBP2-202 Exon Skipping & Inclusion | Exon 12      | R | TTGATTTTGGCGCCTTGACG     |     |
| EIF4H  | EIF4H-001 Exon Skipping             | Exon 4A      | F | ATCGGTCACTTCGTGTGGAC     | 101 |
| EIF4H  | EIF4H-001 Exon Skipping             | Exon 4 & 6   | R | GTCATCCCTGAAGCCTCTGTC    |     |
| EIF4H  | EIF4H-001 Exon Inclusion            | Exon 4B      | F | GTCACTTCGTGTGGACATTGC    | 179 |
| EIF4H  | EIF4H-001 Exon Inclusion            | Exon 4 & 5   | R | AGAGCTACCCATTCTCTGTC     |     |
| PFKFB3 | PFKFB3-001                          | Exon 1 & 2   | F | CCCTTCAGGAAAGCCTGTGG     | 139 |
| PFKFB3 | PFKFB3-002                          | Exon 1B      | F | CCGAGTGCAGAAGATCTGGG     | 179 |
| PFKFB3 | PFKFB3-001 & 002                    | Exon 2B      | R | CTTTTGTGGGGACGCCAATC     |     |
| VGLL4  | VGLL4-001                           | Exon 2A      | F | TGACGAAAAACGCGAAGCTG     | 150 |
| VGLL4  | VGLL4-001                           | Exon 3A      | R | TCTAGGTCCTCGTCACCTGG     |     |
| VGLL4  | VGLL4-003                           | Exon 1B      | F | TTGGGGCAAAGCAAAGAGC      | 180 |
| VGLL4  | VGLL4-003                           | Exon 2B      | R | CGGCAGGGTCTGTATTCTGG     |     |
| PPIA   | PPIA-001                            | Exon1        | F | ACGGCGAGCCCTTGG          | 223 |
| PPIA   | PPIA-001                            | Exon2        | R | TTTCTGCTGTCTTTGGGACCT    |     |
| EEF1G  | EEF1G-001                           | Exon2        | F | AACCGCACCCCTGAATTC       | 68  |
| EEF1G  | EEF1G-001                           | Exon3        | R | CCATCATCACCCCTCAAATGCT   |     |
| PTGS2  | PTGS2-001                           | Exon7        | F | TGCCTGGTCTGATGATGTATGCCA | 306 |
| PTGS2  | PTGS2-001                           | Exon8        | R | TTTGAAAGGTGTCAGGCAGAAGGG |     |

## Supplementary Table S3
